# Supplementary material for: Degradation of the cellulosic key chromophores 2,5- and 2,6-dihydroxyacetophenone by hydrogen peroxide under alkaline conditions. Chromophores in cellulosics, XVII
Source: Springer Nature journal article supplement (doi:10.1007/s10570-018-1817-0), 2018-05-16
Supplement: MOESM1 [file 15772956]

**Degradation of the cellulosic key chromophores 2,5- and 2,6-dihydroxyacetophenone by hydrogen peroxide under alkaline conditions. Chromophores in cellulosics, XVII.**

Nele Sophie Zwirchmayr,1 Ute Henniges,1 Markus Bacher,1 Takashi Hosoya,2
Heidemarie Reiter,3 Martin Spitzbart,3 Thomas Dietz,4 Klaus Eibinger,5
Wolfgang Kreiner,6 Arnulf Kai Mahler,6 Heribert Winter,6 Thomas Röder,7
Antje Potthast,1 Thomas Elder,8 Thomas Rosenau 1,9*

1 Division of Chemistry of Renewable Resources, Department of Chemistry, University of Natural Resources and Life Sciences, Muthgasse 18, A-1190 Vienna, Austria

2 Graduate School of Life and Environmental Sciences, Kyoto Prefectural University, Shimogamo-hangi-cho 11-5, Sakyo-ku, Kyoto-shi, Kyoto, Japan

3 Mondi Uncoated Fine & Kraft Paper GmbH, Marxergasse 4A, A-1030 Vienna, Austria

4 Evonik-Degussa, Rodenbacher Chaussee 4, D-63457 Hanau-Wolfgang, Germany

5 Zellstoff Pöls AG, Dr. Luigi-Angeli-Str. 9, A-8761 Pöls, Austria

6 SAPPI Papier Holding GmbH, Brucker Str. 21, A-8101 Gratkorn, Austria

7 Lenzing AG, Werkstraße 2, A-4860 Lenzing, Austria

8 USDA Forest Service, Southern Research Station, 521 Devall Dr., Auburn, AL 36849, USA

9 Johan Gadolin Process Chemistry Centre, Åbo Akademi University, Porthansgatan 3, Åbo/Turku FI-20500, Finland

**Contents of the supporting information file**

NMR spectra of the H2O2 degradation of compounds **1** and **2**

GC-MS spectra of the products of H2O2 degradation of compounds **1** and **2**


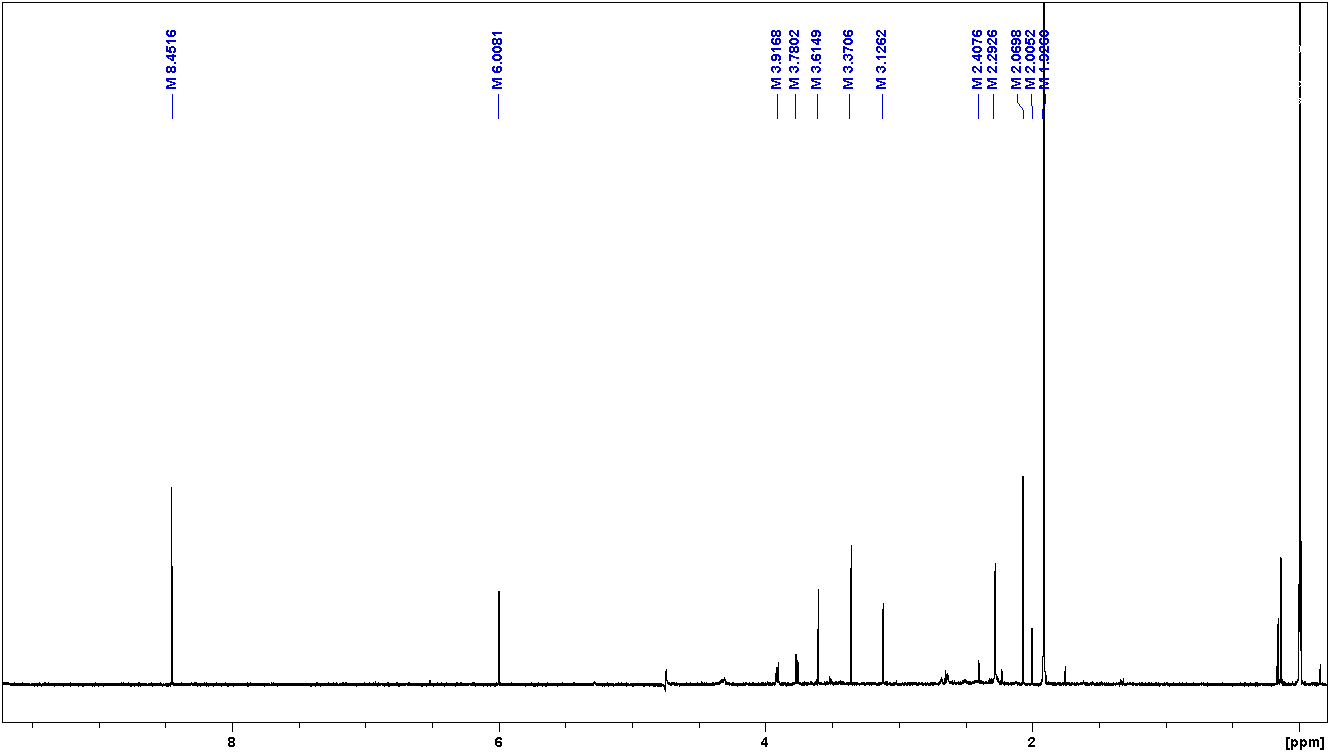


Figure 1. 1H NMR spectrum in H2O/D2O with DSS as a standard of compound **1** 24 hours after the addition of 5 molar equivalents of H2O2.


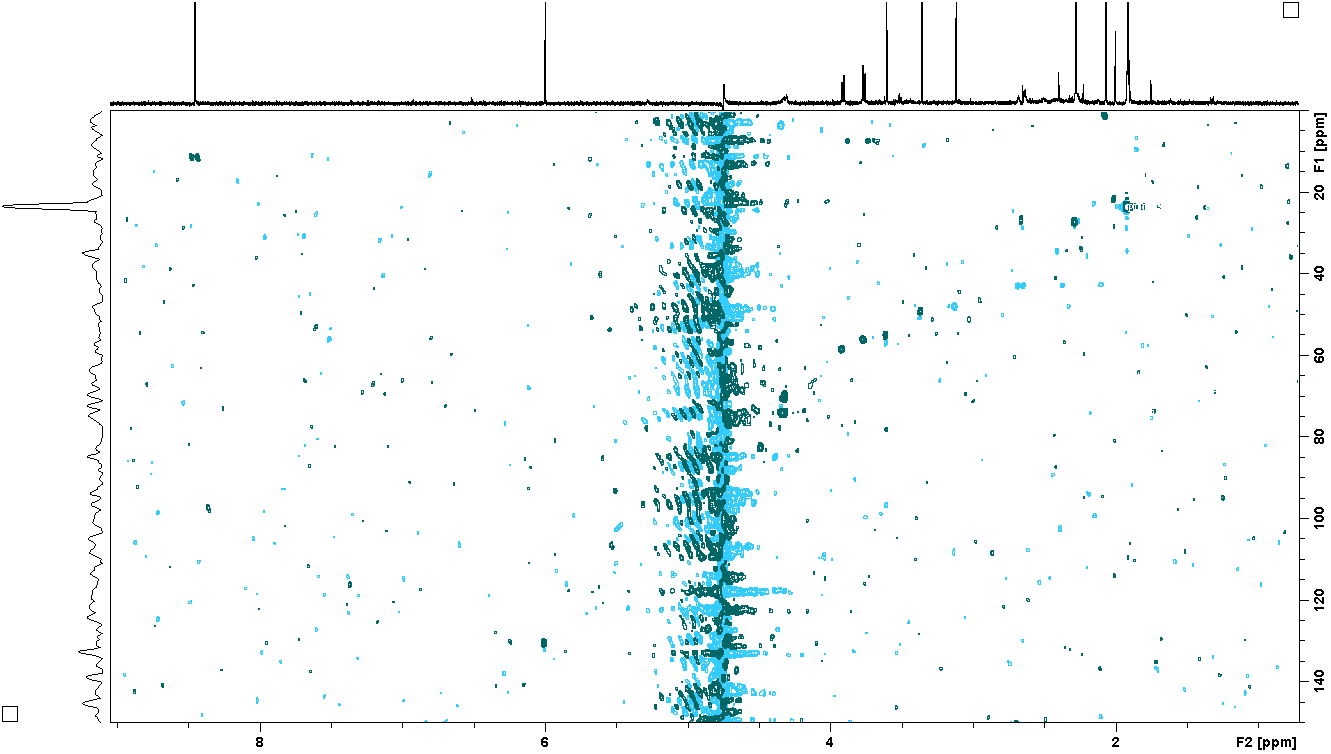


Figure 2. HSQC NMR spectrum in H2O/D2O with DSS as a standard of compound **1** 24 hours after the addition of 5 molar equivalents of H2O2


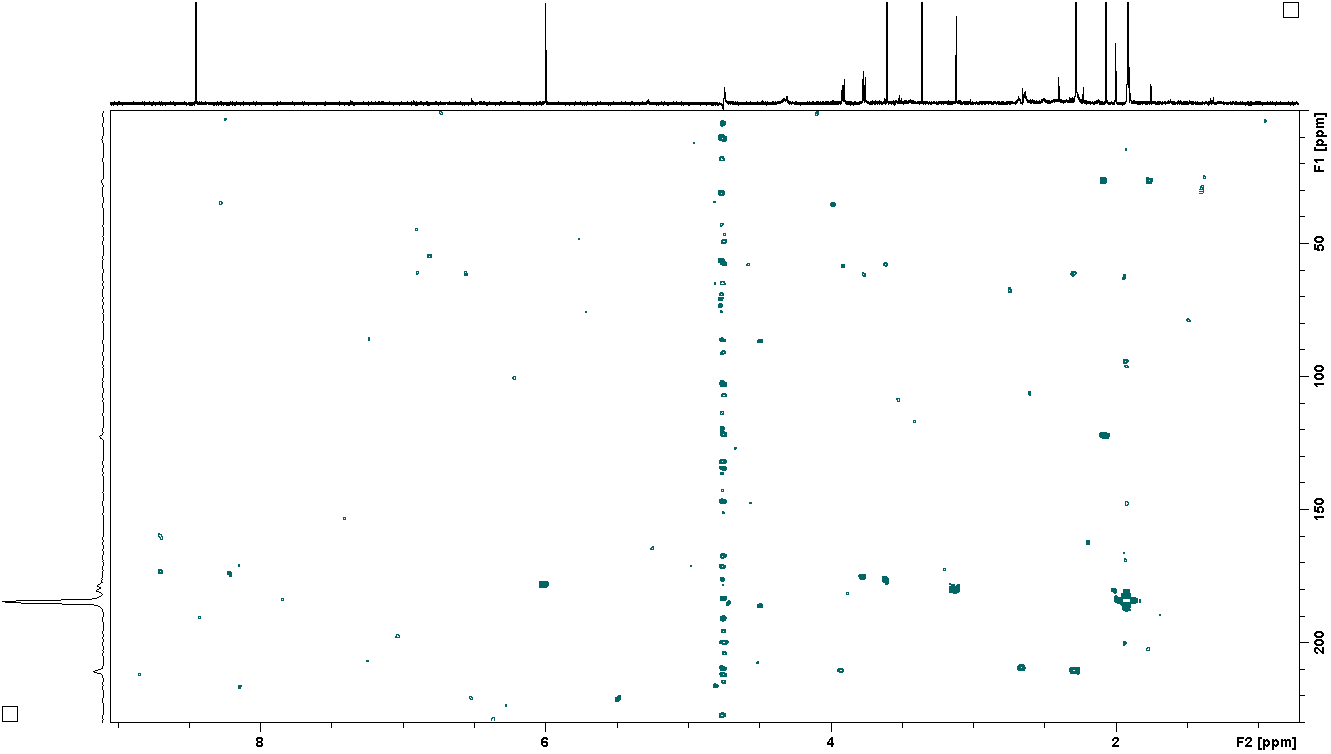


Figure 3. HMBC NMR spectrum in H2O/D2O with DSS as a standard of compound **1** 24 hours after the addition of 5 molar equivalents of H2O2.


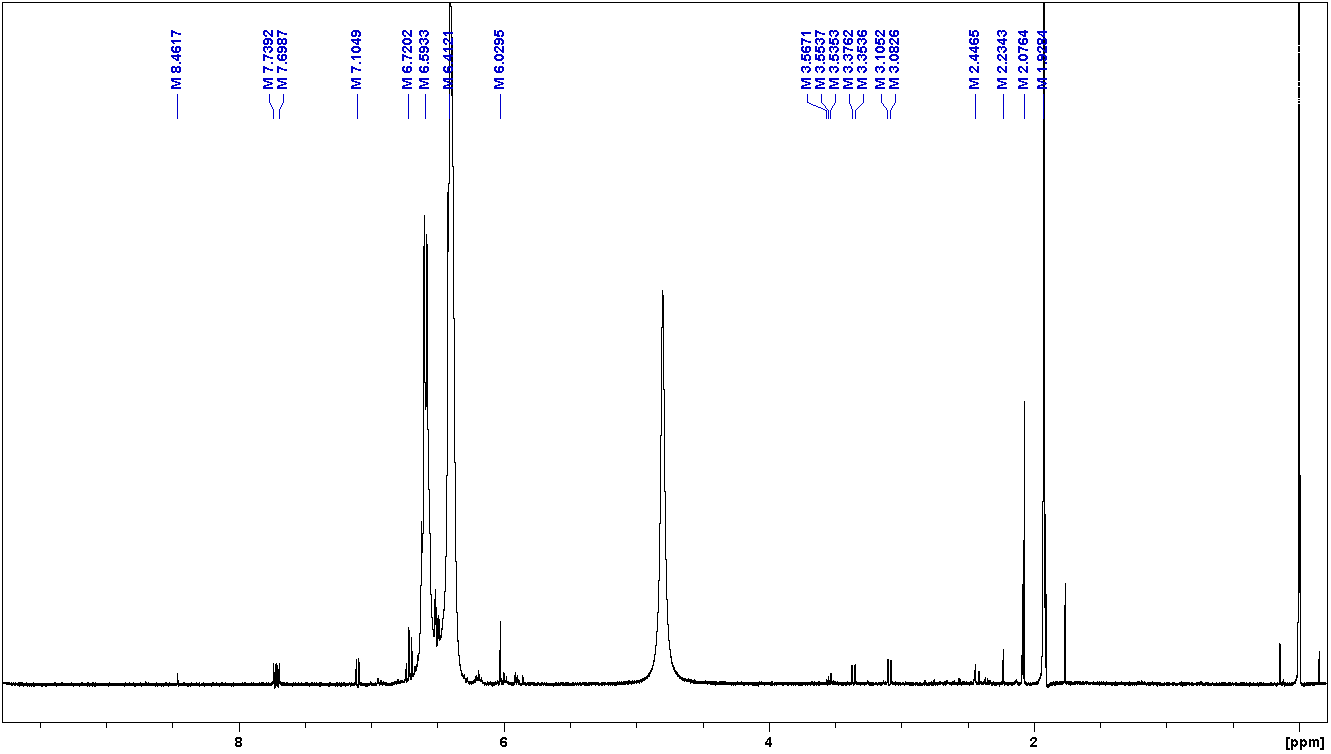


Figure 4. 1H NMR spectrum in H2O/D2O with DSS as a standard of compound **2** 24 hours after the addition of 5 molar equivalents of H2O2.


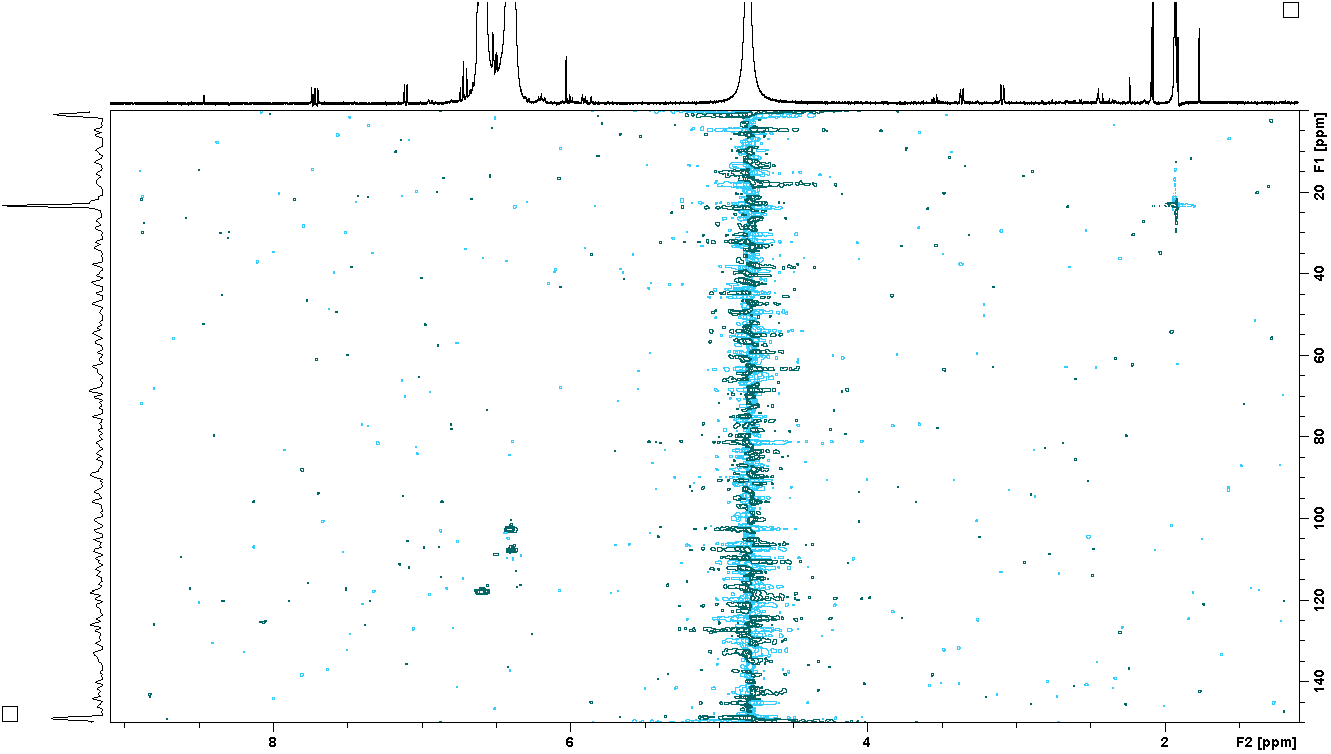


Figure 5. HSQC NMR spectrum in H2O/D2O with DSS as a standard of compound **2** 24 hours after the addition of 5 molar equivalents of H2O2.


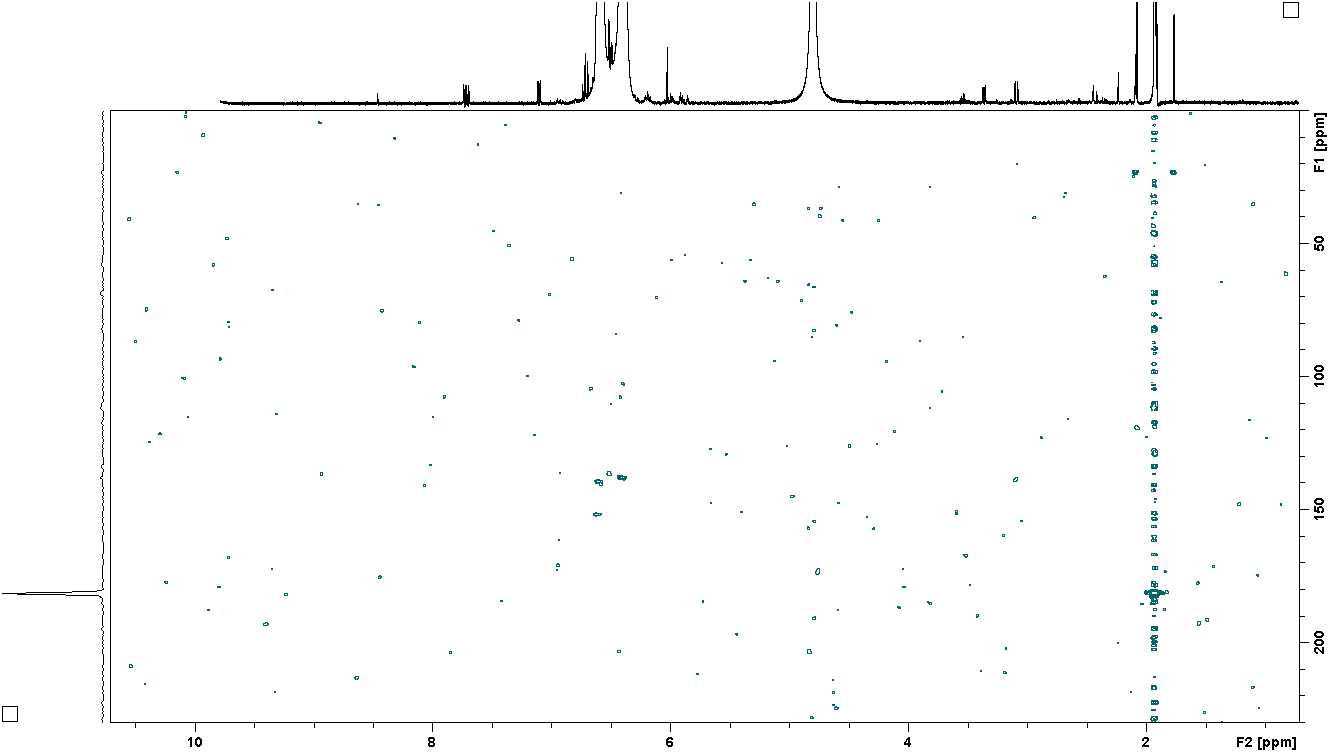


Figure 6. HSQC NMR spectrum in H2O/D2O with DSS as a standard of compound **2** 24 hours after the addition of 5 molar equivalents of H2O2.


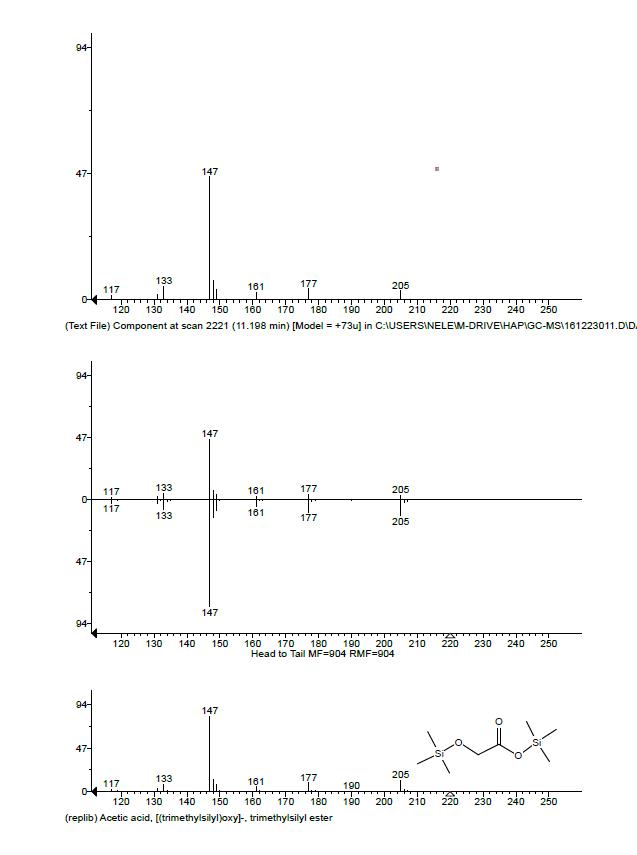
Figure 7. Glycolic acid MS spectrum extracted from GS-MS data of H2O2 degradation of compound **2**.
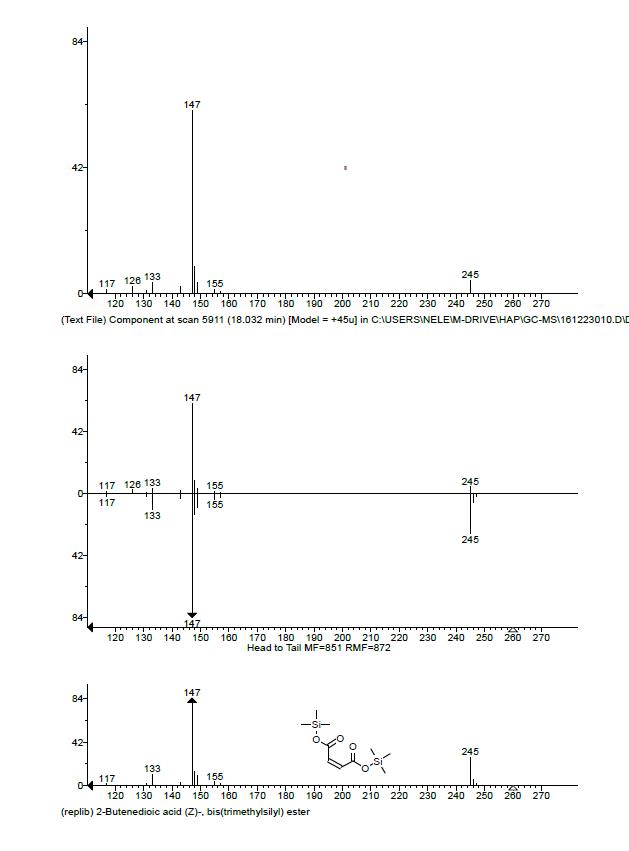
Figure 8. Maleic acid MS spectrum extracted from GS-MS data of H2O2 degradation of compound **2.**
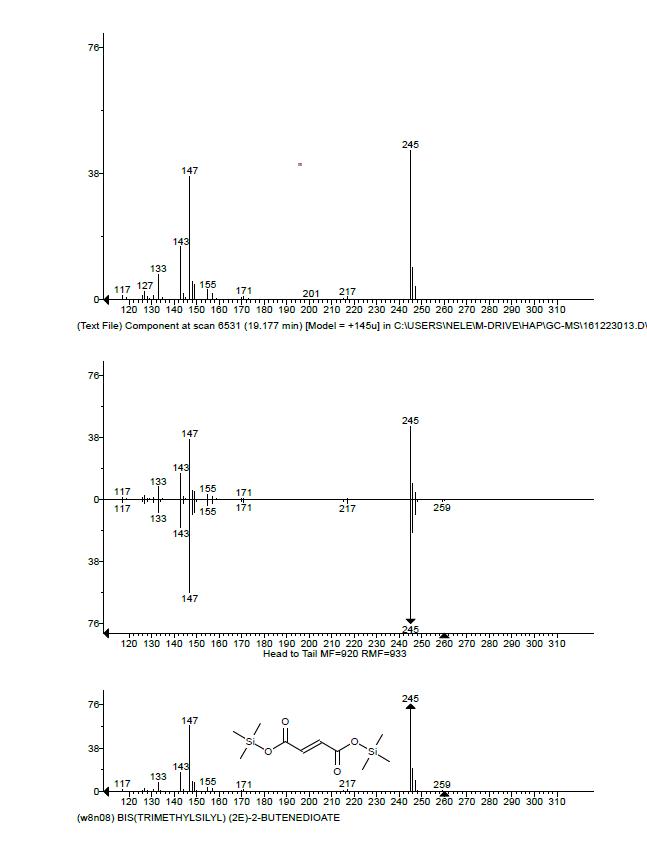


Figure 9. Maleic acid MS spectrum extracted from GS-MS data of H2O2 degradation of compound **1**.


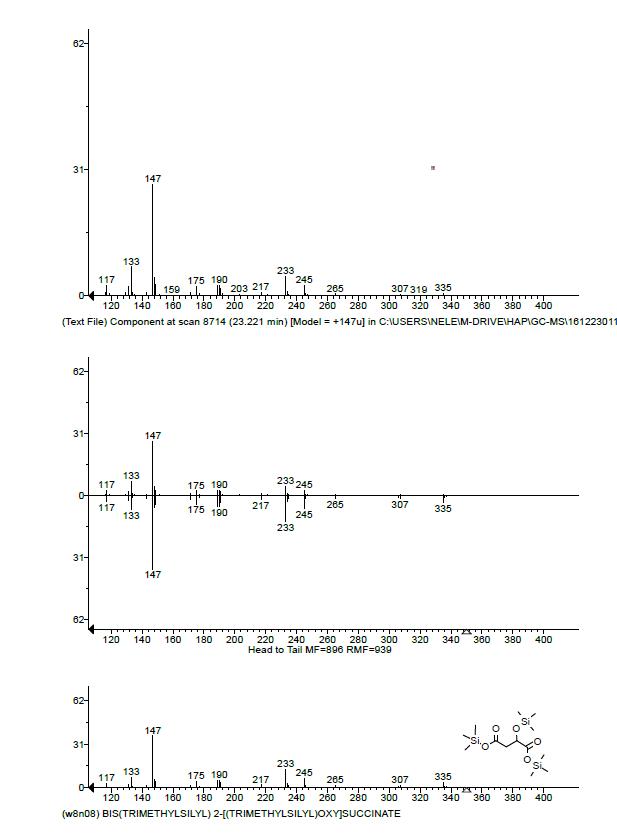
Figure 10. Malic acid MS spectrum extracted from GS-MS data of H2O2 degradation of compound **2**.
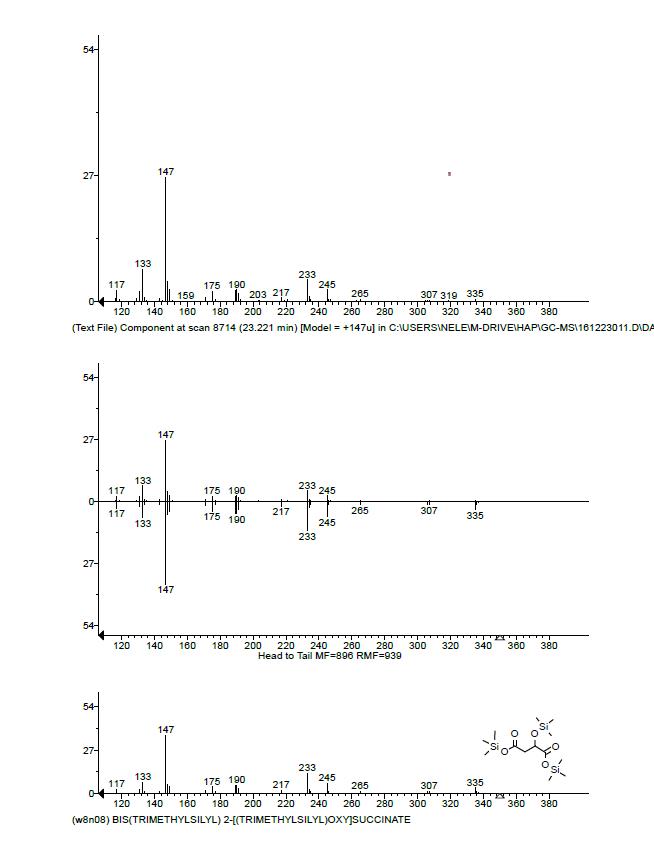
Figure 11. Malic acid MS spectrum extracted from GS-MS data of H2O2 degradation of compound **1**.


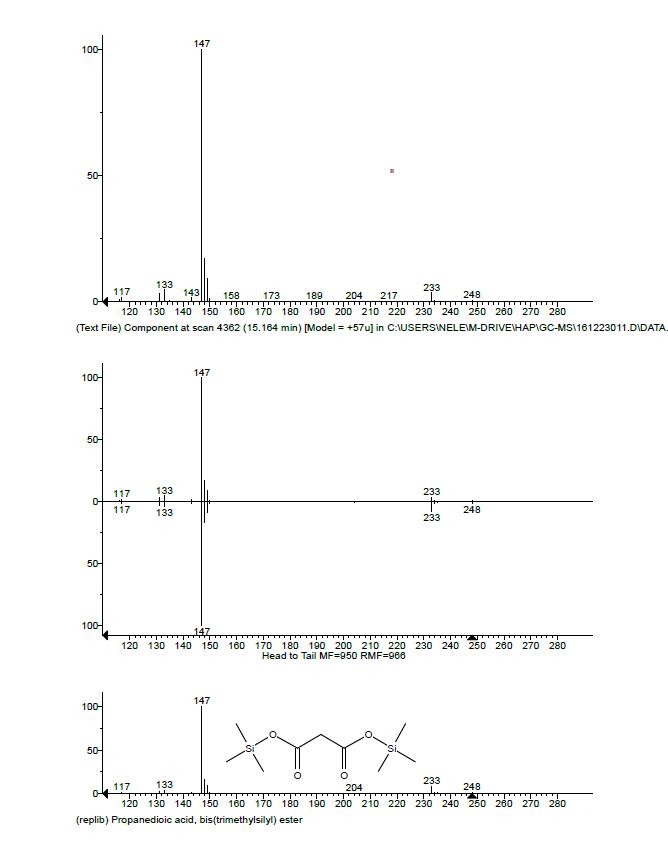
Figure 12. Malonic acid MS spectrum extracted from GS-MS data of H2O2 degradation of compound **2**.
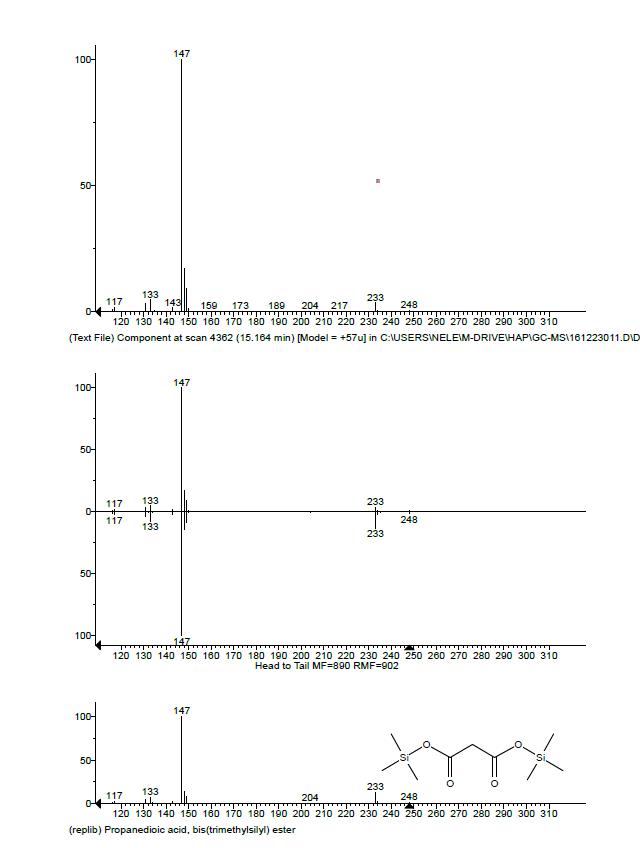
Figure 13. Malonic acid MS spectrum extracted from GS-MS data of H2O2 degradation of compound **1**.


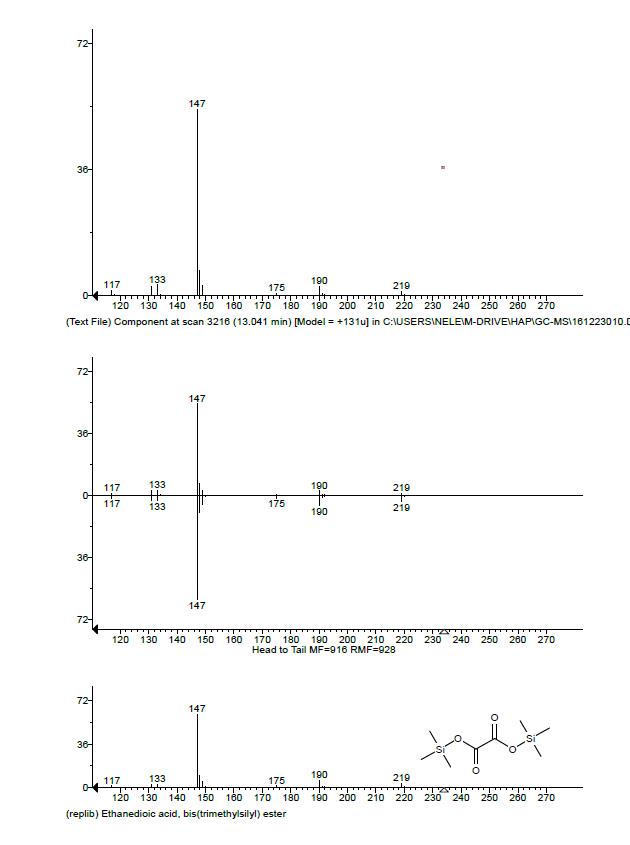
Figure 14. Oxalic acid MS spectrum extracted from GS-MS data of H2O2 degradation of compound **2**.
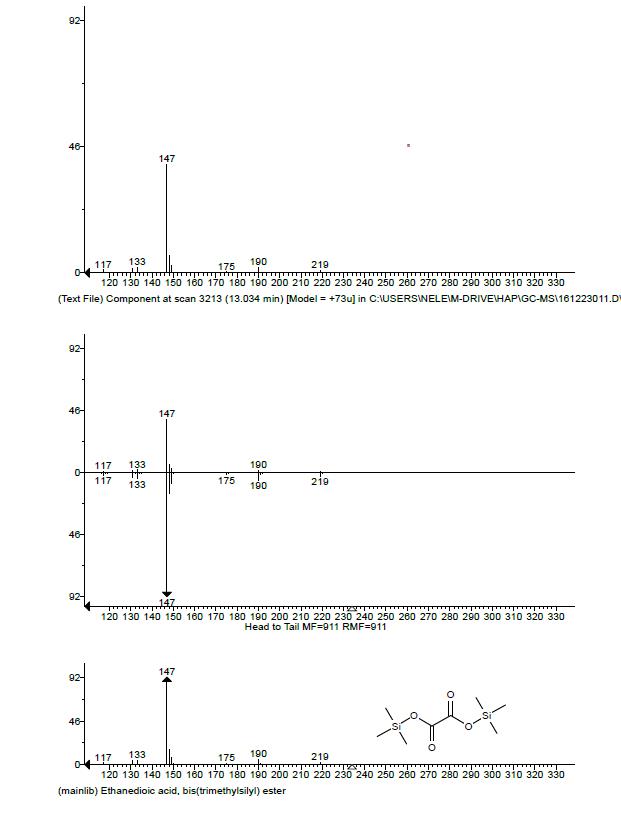
Figure 15. Oxalic acid MS spectrum extracted from GS-MS data of H2O2 degradation of compound **1**.
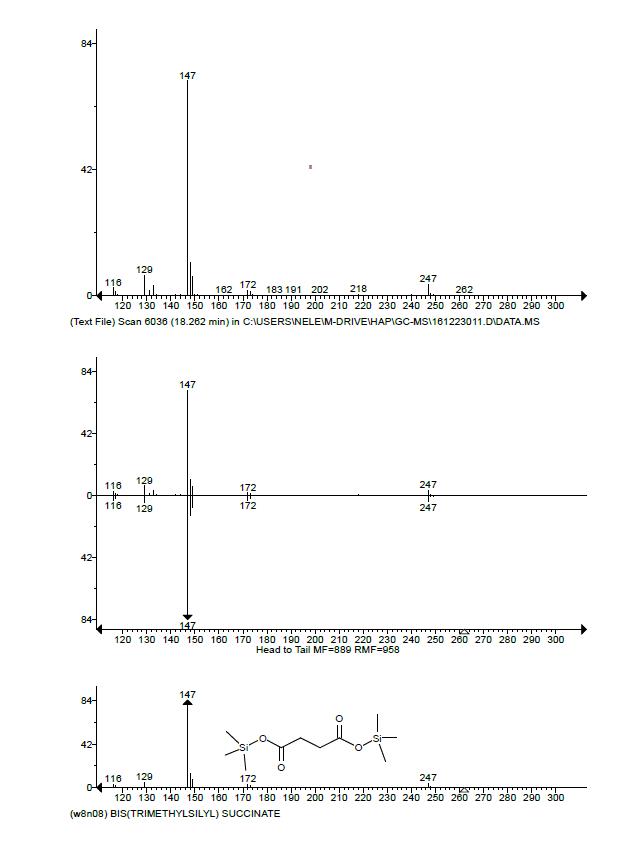
Figure 16. Succinic acid MS spectrum extracted from GS-MS data of H2O2 degradation of compound **2.**
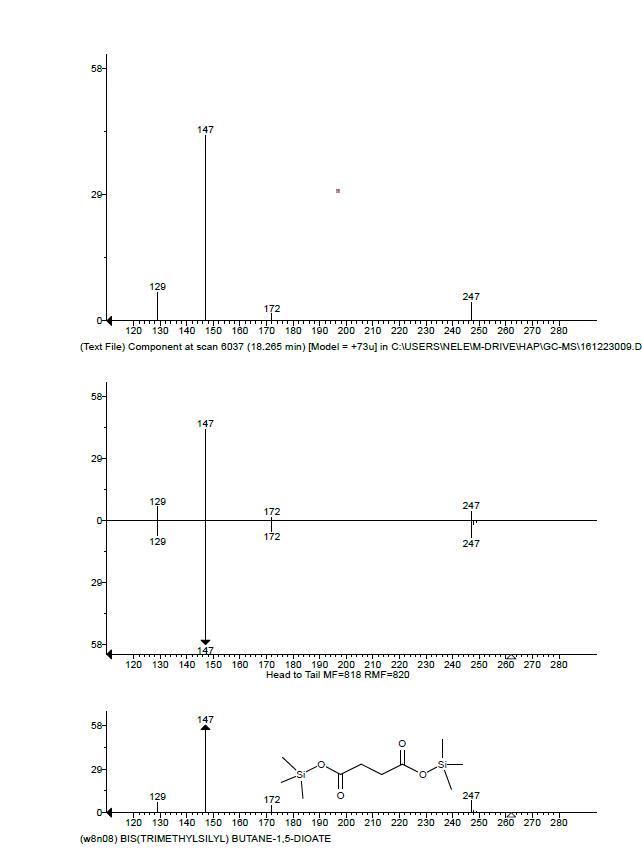
Figure 17. Succinic acid MS spectrum extracted from GS-MS data of H2O2 degradation of compound **1**.
